# Supplementary material
Source: PubMed Central journal article supplement (PMC4332645)
Supplement: DS_10.1177_1941738114559705.pdf [file DS_10.1177_1941738114559705.pdf]

**Appendix.** All surgical procedures performed during the study period

**Male Surgical Procedures (n = 22)**

**Neck (n = 1)**

C5-6 fusion for bilateral jumped facets

**Shoulder (n = 5)**

Shoulder labrum repair

Distal clavicle excision shoulder

Shoulder biceps/proximal long head rupture repair

SLAP repair (shoulder)

Shoulder rotator cuff repair

**Elbow/Hand/Wrist (n = 7)**

Wrist triangular fibrocartilage complex repair (3)

Elbow arthroscopy - impingement (2)

Wrist arthroscopy/debridement

Open reduction internal fixation - radius

**Knee (n = 6)**

Anterior cruciate ligament reconstruction (3)

Knee osteochondral autograft

Meniscus repair

Patellar tendon debridement

**Ankle/Foot (n = 3)**

Ankle arthroscopy - impingement (2)

Talus fracture ORIF posterior process

**Female Surgical Procedures (n = 49)**

**Shoulder (n = 4)**

Distal clavicle excision with subacromial decompression

Rotator cuff repair and SLAP debridement (shoulder)

Open reduction internal fixation - os acromiale

Distal clavicle excision

**Elbow/Hand/Wrist (n = 6)**

Elbow arthroscopy - impingement (2)

Open reduction internal fixation - scaphoid

Carpal boss excision

Open reduction internal fixation - forearm

Elbow UCL reconstruction

**Hip (n = 1)**

Hip arthroscopy labral debridement

**Knee/Leg (n = 17)**

Anterior cruciate ligament reconstruction (x6)

Meniscus partial meniscectomy (4)

Meniscus repair (3)

Meniscectomy with meniscus transplant

Patella tendinitis debridement

Intramedullary rod - tibia stress fracture

Fulkerson osteotomy for patellar instability

**Ankle/Foot (n = 21)**

Ankle arthroscopy - impingement (9)

Achilles tendon repair (2)

Ankle arthroscopy - os trigonum excision (2)

Hardware removal - foot - Lisfranc

Open reduction internal fixation - Lisfranc

Subtalar osteochondral defect debridement

Open reduction internal fixation - ankle

Repair of flexor tendon (foot)

Tendon repair foot - peroneal

Arthrodesis great toe interphalangeal joint

Ankle arthroscopy - tenosynovectomy
